# Supplementary material for: Title: LAMP Assays for the Simple and Rapid Detection of Clinically Important Urinary Pathogens Including the Detection of Resistance to 3rd Generation Cephalosporins
Source: Research Square preprint supplement (doi:10.21203/rs.3.rs-464488/v1), 2021-04-29
Supplement: Supplementary file 1 [file 05145bcf29d01898a67c594c.xlsx]

## Sheet: Feuil1
Table 1. Bacteria used for the P. mirabilis-LAMP assay
Strains		Numbers of isolates tested	P. mirabilis-LAMP positive assay
Reference strains	Proteus mirabilis U2A 1878	1	1
	Escherichia coli U2A 1790	1	0
	Klebsiella pneumoniae U2A 759	1	0
	Enterobacter cloacae U2A 2242	1	0
	Pseudomonas aeruginosa U2A 1125	1	0
	Acinetobacter baumannii U2A 2479	1	0
	Kluyvera georgianaU2A 2251	1	0
	Citrobacter freundii 080320-170	1	0
	Pantoea spp. 080326-0195	1	0
	Serratia marcescens 070223-087	1	0
	Morganella morganii 061030-0203	1	0
	Haemophillus influenzae11-1717	1	0
	Salmonella spp. U2A 2145	1	0
	Staphylococcus epidermidis 11-1819	1	0
	Staphylococcus aureus 11-1669	1	0
	Enterococcus faecalis 262 Bact. Med.	1	0
	Streptococcus agalactiae 127 Bact. Med.	1	0
Clinical strains	Proteus mirabilis	38	38
	Proteus vulgaris	3	0
	Escherichia coli	4	0
	Klebsiella pneumoniae	4	0
	Raoultella sp.	1	0
	Citrobacter freundii	1	0
	Citrobacter koseri	1	0
	Serratia marcescens	1	0
	Enterococus faecium	1	0
	Enterococcus faecalis	2	0
	Streptococcus agalactiae	2	0
